# Supplementary material
Source: MDPI journal article supplement (https://www.mdpi.com/1424-2818/15/8/901)

# Relationships between Fish Community Structure and Environmental Factors in the Nearshore Waters of Hainan Island, South China

Zhengli Luo <sup>1,2</sup>, Changping Yang <sup>1,3</sup>, Liangming Wang <sup>1,3</sup>, Yan Liu <sup>1,3</sup>, Binbin Shan <sup>1,3</sup>, Manting Liu <sup>1</sup>, Cheng Chen <sup>1,3</sup>, Tao Guo <sup>4,\*</sup> and Dianrong Sun <sup>1,3,\*</sup>

<sup>1</sup> South China Sea Fisheries Research Institute, Chinese Academy of Fisheries Sciences, Guangzhou 510300, China; luohua0303@163.com (Z.L.); yangchangping@scsfri.ac.cn (C.Y.); wangliangming@scsfri.ac.cn (L.W.); liuyan@scsfri.ac.cn (Y.L.); shanbinbin@scsfri.ac.cn (B.S.); liumanting@scsfri.ac.cn (M.L.); chencheng@scsfri.ac.cn (C.C.)

<sup>2</sup> School of Fisheries, Zhejiang Ocean University, Zhoushan 316022, China

<sup>3</sup> Key Laboratory for Marine Ranching, Ministry of Agriculture and Rural Affairs, Guangzhou 510300, China

<sup>4</sup> Hainan Administration of Off-Season Plant Breeding and Seed Production Services, Sanya 572000, China

\* Correspondence: gtfree@126.com (T.G.); drsun73@scsfri.ac.cn (D.S.)

**Table S1**

List of identified fish species in the coastal waters of Hainan Island.

| Numbers | Order              | Family     | Genus               | Species                        | Spring | Autumn |
|---------|--------------------|------------|---------------------|--------------------------------|--------|--------|
| 1       | <b>PERCIFORMES</b> | Carangidae | <i>Alectis</i>      | <i>Alectis indica</i>          |        |        |
| 2       |                    |            |                     | <i>Alecitis ciliaris</i>       |        |        |
| 3       |                    |            | <i>Citula</i>       | <i>Citula chrysophrys</i>      |        |        |
| 4       |                    |            | <i>Carangoides</i>  | <i>Carangoides kalla</i>       | sp1    | sp85   |
| 5       |                    |            |                     | <i>Carangoides mate</i>        | sp39   | sp136  |
| 6       |                    |            |                     | <i>Carangoides malabaricus</i> | sp162  | sp91   |
| 7       |                    |            |                     | <i>Carangoides malam</i>       |        | sp52   |
| 8       |                    |            |                     | <i>Decapterus</i>              |        |        |
| 9       |                    |            |                     | <i>Decapterus maruadsi</i>     | sp2    | sp83   |
| 10      |                    |            |                     | <i>Decapterus macrosoma</i>    | sp65   |        |
| 11      |                    |            |                     | <i>Decapterus russelli</i>     | sp146  |        |
| 12      |                    |            | <i>Atropus</i>      | <i>Atropus atropus</i>         |        | sp43   |
| 13      |                    |            | <i>Trachurus</i>    | <i>Trachurus japonicus</i>     | sp3    | sp152  |
| 14      |                    |            | <i>Trachinotus</i>  | <i>Trachinotus ovatus</i>      | sp36   |        |
| 15      |                    |            | <i>Selaroides</i>   | <i>Selaroides leptolepis</i>   | sp37   |        |
| 16      |                    |            | <i>Selar</i>        | <i>Selar crumenophthalmus</i>  |        |        |
| 17      |                    |            | <i>Megalaspis</i>   | <i>Megalaspis cordyla</i>      |        |        |
| 18      |                    |            | <i>Caranx</i>       | <i>Caranx helvolus</i>         |        |        |
| 19      |                    |            |                     | <i>Caranx equula</i>           | sp70   |        |
| 20      |                    |            |                     | <i>Caranx malabaricus</i>      |        |        |
| 21      |                    |            | <i>Zonichthys</i>   | <i>Zonichthys nirofasciata</i> |        |        |
| 22      |                    |            | <i>Scomberoides</i> | <i>Scomberoides lysan</i>      |        |        |
| 23      |                    |            |                     | <i>Scomberoides tol</i>        |        |        |
|         |                    |            | <i>Alepes</i>       | <i>Alepes djedaba</i>          |        |        |

|    |                            |                       |                                  |       |       |
|----|----------------------------|-----------------------|----------------------------------|-------|-------|
| 24 | Trichiuridae               | <i>Trichiurus</i>     | <i>Trichiurus brevis</i>         | sp4   | sp33  |
| 25 |                            |                       | <i>Trichiurus haumela</i>        | sp42  | sp29  |
| 26 |                            |                       | <i>Trichiurus nanhaiensis</i>    |       |       |
| 27 |                            |                       | <i>Trichiurus lepturus</i>       |       |       |
| 28 | Centrolophidae<br>Sparidae | <i>Tentoriceps</i>    | <i>Tentoriceps cristatus</i>     | sp72  |       |
| 29 |                            | <i>Lepturacanthus</i> | <i>Lepturacanthus savala</i>     |       | sp111 |
| 30 |                            | <i>Psenopsis</i>      | <i>Psenopsis anomala</i>         | sp5   | sp15  |
| 31 |                            | <i>Parargyrops</i>    | <i>Parargyrops edita</i>         | sp6   | sp40  |
| 32 |                            | <i>Sparus</i>         | <i>Sparus latus</i>              |       |       |
| 33 |                            | <i>Pagrosomus</i>     | <i>Pagrosomus major</i>          |       | sp145 |
| 34 |                            | <i>Taius</i>          | <i>Taius tumifrons</i>           |       |       |
| 35 |                            | <i>Dentex</i>         | <i>Dentex tumifrons</i>          | sp112 |       |
| 36 |                            | Callionymidae         | <i>Callionymus</i>               | sp8   | sp117 |
| 37 |                            |                       | <i>Callionymus richardsoni</i>   | sp53  | sp84  |
| 38 |                            |                       | <i>Callionymus kaianus</i>       | sp151 |       |
| 39 | Branchiostegidae           | <i>Calliurichthys</i> | <i>Calliurichthys japonicus</i>  | sp90  | sp107 |
| 40 |                            | <i>Branchiostegus</i> | <i>Branchiostegus argentatus</i> | sp22  | sp131 |
| 41 |                            |                       | <i>Branchiostegus japonicus</i>  | sp152 |       |
| 42 |                            |                       | <i>Branchiostegus albus</i>      | sp23  | sp5   |
| 43 | Ariommidae                 | <i>Ariomma</i>        | <i>Ariomma indica</i>            | sp10  | sp134 |
| 44 |                            |                       | <i>Ariomma luridum</i>           |       |       |
| 45 | Echeneidae                 | <i>Echeneis</i>       | <i>Echeneis naucrates</i>        |       |       |
| 46 | Parapercidae               | <i>Parapercis</i>     | <i>Parapercis sexfasciata</i>    | sp9   | sp87  |
| 47 | Drepanidae                 | <i>Drepane</i>        | <i>Drepane punctata</i>          | sp164 |       |
| 48 |                            |                       | <i>Drepane longimana</i>         |       |       |
| 49 | Scorpidae                  | <i>Microcanthus</i>   | <i>Microcanthus strigatus</i>    |       |       |

|    |               |                       |                                    |       |       |
|----|---------------|-----------------------|------------------------------------|-------|-------|
| 50 | Menidae       | <i>Mene</i>           | <i>Mene maculata</i>               |       |       |
| 51 | Gempylidae    | <i>Rexea</i>          | <i>Rexea prometheoides</i>         |       |       |
| 52 | Sillaginidae  | <i>Sillago</i>        | <i>Sillago sihama</i>              |       |       |
| 53 |               |                       | <i>Sillago japonica</i>            |       |       |
| 54 | Scolopsidae   | <i>Scolopsis</i>      | <i>Scolopsis vosmeri</i>           |       |       |
| 55 | Ephippidae    | <i>Ephippus</i>       | <i>Ephippus orbis</i>              | sp163 |       |
| 56 | Bembropidae   | <i>Bembrops</i>       | <i>Bembrops caudimacula</i>        | sp161 |       |
| 57 | Cirrhitidae   | <i>Cirrhitichthys</i> | <i>Cirrhitichthys aureus</i>       |       |       |
| 58 | Nomeidae      | <i>Cubiceps</i>       | <i>Cubiceps squamiceps</i>         |       |       |
| 59 | Nemirteridae  | <i>Nemipterus</i>     | <i>Nemipterus marginatus</i>       | sp12  |       |
| 60 |               |                       | <i>Nemipterus bathybius</i>        | sp77  |       |
| 61 |               |                       | <i>Nemipterus japonicus</i>        |       | sp106 |
| 62 |               |                       | <i>Nemipterus nemurus</i>          | sp83  |       |
| 63 |               |                       | <i>Nemipterus virgatus</i>         | sp55  | sp74  |
| 64 |               |                       | <i>Nemipterus aurorus</i>          |       |       |
| 65 | Myllidae      | <i>Upeneus</i>        | <i>Upeneus sulphureus</i>          | sp14  | sp59  |
| 66 |               |                       | <i>Upeneus vittatus</i>            | sp149 |       |
| 67 |               |                       | <i>Upeneus tragula</i>             |       |       |
| 68 |               |                       | <i>Upeneus moluccensis</i>         |       |       |
| 69 |               |                       | <i>Upeneus japonicus</i>           | sp44  | sp102 |
| 70 |               |                       | <i>Parupeneus multifasciatus</i>   |       |       |
| 71 |               |                       | <i>Parupeneus heptacanthus</i>     |       |       |
| 72 | Cepolidae     | <i>Acanthocephala</i> | <i>Acanthocephala krusensterni</i> | sp17  |       |
| 73 |               |                       | <i>Acanthocephala limbata</i>      |       |       |
| 74 |               | <i>Cepola</i>         | <i>Cepola schlegeli</i>            |       |       |
| 75 | Uranoscopidae | <i>Uranoscopus</i>    | <i>Uranoscopus oligolepis</i>      | sp21  | sp112 |

|     |                 |                       |                                  |       |       |
|-----|-----------------|-----------------------|----------------------------------|-------|-------|
| 76  |                 |                       | <i>Uranoscopus japonicus</i>     | sp57  | sp108 |
| 77  | Apogonidae      | <i>Apogon</i>         | <i>Apogon ellioti</i>            | sp156 |       |
| 78  |                 |                       | <i>Apogon carinatus</i>          |       |       |
| 79  |                 |                       | <i>Apogon quadrifasciatus</i>    | sp25  | sp118 |
| 80  |                 |                       | <i>Apogon striatus</i>           | sp26  | sp81  |
| 81  |                 |                       | <i>Apogon kiensis</i>            | sp52  | sp150 |
| 82  |                 |                       | <i>Apogon semilineatus</i>       | sp103 | sp10  |
| 83  |                 |                       | <i>Apogon lateralis</i>          |       | sp125 |
| 84  |                 |                       | <i>Apogon lineata</i>            |       | sp123 |
| 85  |                 |                       | <i>Apogon taeniophorus</i>       | sp132 | sp12  |
| 86  |                 |                       | <i>Apogon arafurae</i>           |       | sp53  |
| 87  |                 | <i>Ostorhinchus</i>   | <i>Ostorhinchus gularis</i>      | sp88  |       |
| 88  |                 | <i>Apogonichthys</i>  | <i>Apogonichthys ellioti</i>     | sp24  | sp50  |
| 89  |                 |                       | <i>Apogonichthys carinatus</i>   | sp102 | sp8   |
| 90  |                 |                       | <i>Apogonichthys lineatus</i>    | sp158 | sp122 |
| 91  | Champsodontidae | <i>Champsodon</i>     | <i>Champsodon atridorsalis</i>   | sp27  | sp42  |
| 92  | Gobiidae        | <i>Oxyurichthys</i>   | <i>Oxyurichthys papuensis</i>    | sp32  | sp3   |
| 93  |                 |                       | <i>Oxyurichthys tentacularis</i> |       |       |
| 94  |                 | <i>Myersina</i>       | <i>Myersina filifer</i>          | sp50  |       |
| 95  |                 | <i>Chaeturichthys</i> | <i>Chaeturichthys stigmatias</i> | sp167 |       |
| 96  |                 | <i>Cryptocentrus</i>  | <i>Cryptocentrus papuanus</i>    |       | sp4   |
| 97  | Taenioididae    | <i>Trypauchen</i>     | <i>Trypauchen vagina</i>         | sp136 | sp79  |
| 98  | Serranidae      | <i>Epinephelus</i>    | <i>Epinephelus sexfasciatus</i>  |       |       |
| 99  |                 |                       | <i>Epinephelus areolatus</i>     |       |       |
| 100 |                 |                       | <i>Epinephelus latifasciatus</i> |       |       |
| 101 |                 |                       | <i>Epinephelus stictus</i>       | sp98  | sp95  |

|     |               |                      |                                      |       |       |
|-----|---------------|----------------------|--------------------------------------|-------|-------|
| 102 |               |                      | <i>Epinephelus epistictus</i>        |       |       |
| 103 |               |                      | <i>Epinephelus coioides</i>          |       |       |
| 104 |               |                      | <i>Epinephelus bleekeri</i>          |       | sp14  |
| 105 |               |                      | <i>Epinephelus fasciatomaculatus</i> |       |       |
| 106 |               |                      | <i>Epinephelus amblycephalus</i>     |       |       |
| 107 |               |                      | <i>Epinephelus awoara</i>            |       |       |
| 108 |               |                      | <i>Epinephelus diacanthus</i>        |       | sp115 |
| 109 |               | <i>Chelidoperca</i>  | <i>Chelidoperca margaritifera</i>    | sp63  | sp151 |
| 110 |               | <i>Tosana</i>        | <i>Tosana niwaw</i>                  | sp64  | sp63  |
| 111 |               | <i>Triso</i>         | <i>Triso dermatopterus</i>           | sp145 | sp139 |
| 112 |               | <i>Malakichthys</i>  | <i>Malakichthys wakiyae</i>          | sp154 |       |
| 113 |               | <i>Plectranthias</i> | <i>Plectranthias japonicus</i>       | sp159 |       |
| 114 | Acropomidae   | <i>Acropoma</i>      | <i>Acropoma japonicum</i>            | sp31  | sp41  |
| 115 |               |                      | <i>Acropoma hanedai</i>              | sp144 |       |
| 116 |               | <i>Synagrops</i>     | <i>Synagrops japonicus</i>           |       |       |
| 117 | Sciaenidae    | <i>Pennahia</i>      | <i>Pennahia pawak</i>                | sp40  | sp7   |
| 118 |               |                      | <i>Pennahia argentatus</i>           | sp97  | sp6   |
| 119 |               |                      | <i>Pennahia macrocephalus</i>        | sp119 | sp22  |
| 120 |               | <i>Argyrosomus</i>   | <i>Argyrosomus aneus</i>             |       | sp72  |
| 121 |               | <i>Nibea</i>         | <i>Nibea albiflora</i>               |       |       |
| 122 |               |                      | <i>Nibea chui</i>                    |       |       |
| 123 |               | <i>Johnius</i>       | <i>Johnius belengeri</i>             | sp121 | sp97  |
| 124 |               |                      | <i>Johnius novaehollandiae</i>       |       | sp71  |
| 125 |               |                      | <i>Johnius dussumieri</i>            |       | sp92  |
| 126 |               | <i>Chrysochir</i>    | <i>Chrysochir aureus</i>             | sp128 |       |
| 127 | Leiognathidae | <i>Leiognathus</i>   | <i>Leiognathus bindus</i>            | sp35  | sp58  |

|     |               |                       |                                 |       |       |
|-----|---------------|-----------------------|---------------------------------|-------|-------|
| 128 |               |                       | <i>Leiognathus berbis</i>       | sp74  | sp124 |
| 129 |               |                       | <i>Leiognathus equulus</i>      | sp129 | sp35  |
| 130 |               |                       | <i>Leiognathus ruconius</i>     | sp157 | sp90  |
| 131 |               |                       | <i>Leiognathus brevirostris</i> |       | sp37  |
| 132 |               |                       | <i>Leiognathus fasciatus</i>    |       |       |
| 133 |               | <i>Secutor</i>        | <i>Secutor insidiator</i>       |       |       |
| 134 | Labridae      | <i>Halichoeres</i>    | <i>Halichoeres cyanopleura</i>  |       | sp82  |
| 135 |               | <i>Xyrichtys</i>      | <i>Xyrichtys dea</i>            |       |       |
| 136 |               | <i>Leptojulis</i>     | <i>Leptojulis lambdastigma</i>  |       |       |
| 137 |               | <i>Iniistius</i>      | <i>Iniistius pavo</i>           |       |       |
| 138 |               | <i>Choerodon</i>      | <i>Choerodon azurio</i>         |       |       |
| 139 |               |                       | <i>Choerodon schoenleini</i>    |       |       |
| 140 |               | <i>Pseudolabrus</i>   | <i>Pseudolabrus gracilis</i>    |       |       |
| 141 | Blenniidae    | <i>Xiphasia</i>       | <i>Xiphasia setifer</i>         | sp33  | sp27  |
| 142 |               | <i>Plagiotremus</i>   | <i>Plagiotremus spilistius</i>  |       |       |
| 143 | Siganidae     | <i>Siganus</i>        | <i>Siganus fuscescens</i>       | sp49  | sp48  |
| 144 | Polynemidae   | <i>Polynemus</i>      | <i>Polynemus sextarius</i>      | sp47  | sp88  |
| 145 | Scatophagidae | <i>Scatophagus-</i>   | <i>Scatophagus argus</i>        |       |       |
| 146 | Gerridae      | <i>Gerres</i>         | <i>Gerres filamentosus</i>      | sp41  | sp144 |
| 147 |               |                       | <i>Gerres macrosoma</i>         | sp155 |       |
| 148 |               |                       | <i>Gerres japonica</i>          |       |       |
| 149 | Thunnidae     | <i>Sarda</i>          | <i>Sarda orientalis</i>         |       |       |
| 150 | Scombridae    | <i>Rsdtrelliger</i>   | <i>Rsdtrelliger kanagurta</i>   | sp91  | sp137 |
| 151 |               | <i>Pneumatophorus</i> | <i>Pneumatophorus japonicus</i> | sp38  |       |
| 152 | Cybiidae      | <i>Scombermorus</i>   | <i>Scombermorus commersoni</i>  |       |       |
| 153 | Priacanthidae | <i>Priacanthus</i>    | <i>Priacanthus macracanthus</i> | sp62  | sp36  |

|     |                 |                       |                                      |       |       |
|-----|-----------------|-----------------------|--------------------------------------|-------|-------|
| 154 |                 |                       | <i>Priacanthus tayenus</i>           |       |       |
| 155 |                 | <i>Pristigenys</i>    | <i>Pristigenys nipponia</i>          |       |       |
| 156 | Opistognathidae | <i>Opistognathus</i>  | <i>Opistognathus evermanni</i>       |       |       |
| 157 | Lutjanidae      | <i>Lutjanus</i>       | <i>Lutjanus argentimaculatus</i>     |       |       |
| 158 |                 |                       | <i>Lutjanus erythopterus</i>         |       |       |
| 159 |                 |                       | <i>Lutjanus russellii</i>            | sp133 |       |
| 160 |                 |                       | <i>Lutjanus johni</i>                |       |       |
| 161 | Eleotridae      | <i>Brionobutis</i>    | <i>Brionobutis koilomatodon</i>      |       | sp76  |
| 162 | Chaetodontidae  | <i>Chaetodon</i>      | <i>Chaetodon modestus</i>            | sp137 |       |
| 163 |                 | <i>Heniochus</i>      | <i>Heniochus acuminatus</i>          | sp147 |       |
| 164 | Histiopteridae  | <i>Histiopterus</i>   | <i>Histiopterus typus</i>            |       |       |
| 165 | Theraponidae    | <i>Therapon</i>       | <i>Therapon jarbus</i>               | sp116 | sp121 |
| 166 |                 |                       | <i>Therapon thraps</i>               | sp125 | sp1   |
| 167 |                 | <i>Pelates</i>        | <i>Pelates quadrilineatus</i>        |       |       |
| 168 | Pomadasyidae    | <i>Hapalogenys</i>    | <i>Hapalogenys mucronatus</i>        | sp117 |       |
| 169 |                 | <i>Pomadasy</i>       | <i>Pomadasy maculatus</i>            | sp130 | sp17  |
| 170 |                 | <i>Parapristipoma</i> | <i>Parapristipoma trilineatus</i>    |       |       |
| 171 |                 | <i>Plectorhynchus</i> | <i>Plectorhynchus punctatissimus</i> |       |       |
| 172 | Pomacentridae   | <i>Teixeirichthys</i> | <i>Teixeirichthys jordani</i>        | sp114 | sp99  |
| 173 |                 | <i>Daya</i>           | <i>Daya jordani</i>                  |       |       |
| 174 | Stromateidae    | <i>Pampus</i>         | <i>Pampus argenteus</i>              | sp94  | sp130 |
| 175 |                 |                       | <i>Pampus chinensis</i>              |       |       |
| 176 | Banjosiidae     | <i>Banjos</i>         | <i>Banjos banjos</i>                 | sp100 |       |
| 177 | Trichonotidae   | <i>Trichonotus</i>    | <i>Trichonotus setiger</i>           |       |       |
| 178 | Ammodytidae     | <i>Ammodytes</i>      | <i>Ammodytes personatus</i>          |       | sp138 |
| 179 | Lactariidae     | <i>Lactarius</i>      | <i>Lactarius lactarius</i>           |       | sp110 |



|     |                  |                    |                                   |                                   |                                |                                     |
|-----|------------------|--------------------|-----------------------------------|-----------------------------------|--------------------------------|-------------------------------------|
| 180 |                  | Lethrinidae        | <i>Lethrinus</i>                  | <i>Lethrinus lentjan</i>          |                                |                                     |
| 181 |                  | Formionidae        | <i>Formio</i>                     | <i>Formio niger</i>               |                                |                                     |
| 182 | PLEURONECTIFORME | Cynoglossidae      | <i>Cynoglossus</i>                | <i>Cynoglossus robustus</i>       | sp7                            | sp80                                |
| 183 |                  |                    |                                   | <i>Cynoglossus arel</i>           | sp48                           |                                     |
| 184 |                  |                    |                                   | <i>Cynoglossus nigropinnatus</i>  | sp109                          |                                     |
| 185 |                  |                    |                                   | <i>Cynoglossus macrolepidotus</i> | sp122                          | sp21                                |
| 186 |                  |                    |                                   | <i>Cynoglossus lineolatus</i>     |                                |                                     |
| 187 |                  |                    |                                   | <i>Cynoglossus puncticeps</i>     |                                | sp9                                 |
| 188 |                  |                    |                                   | <i>Cynoglossus brachycephalus</i> |                                |                                     |
| 189 |                  |                    |                                   | <i>Cynoglossus sinicus</i>        |                                |                                     |
| 190 |                  |                    |                                   | Citharidae                        | <i>Brachypleura</i>            | <i>Brachypleura novaezeelandiae</i> |
| 191 |                  | <i>Citharoides</i> | <i>Citharoides macrolepidotus</i> |                                   |                                | sp20                                |
| 192 |                  | Soleidae           | <i>Aseraggodes</i>                | <i>Aseraggodes kobensis</i>       | sp29                           | sp47                                |
| 193 |                  | Pleuronectidae     | <i>Samaris</i>                    | <i>Samaris cristatus</i>          | sp51                           | sp44                                |
| 194 |                  |                    | <i>Samariscus</i>                 | <i>Samariscus latus</i>           |                                |                                     |
| 195 |                  | Bothidae           | <i>Crossorhombus</i>              | <i>Crossorhombus azureus</i>      | sp56                           | sp100                               |
| 196 |                  |                    |                                   | <i>Crossorhombus kobensis</i>     | sp148                          |                                     |
| 197 |                  |                    | <i>Laeops</i>                     | <i>Laeops parviceps</i>           | sp66                           | sp128                               |
| 198 |                  |                    | <i>Arnoglossus</i>                | <i>Arnoglossus macrolophus</i>    | sp76                           | sp142                               |
| 199 |                  |                    |                                   | <i>Arnoglossus tenuis</i>         | sp168                          | sp127                               |
| 200 |                  |                    |                                   | <i>Arnoglossus scapha</i>         | sp108                          | sp26                                |
| 201 |                  |                    |                                   | <i>Arnoglossus japonicus</i>      |                                |                                     |
| 202 |                  |                    | <i>Engyprosopon</i>               | <i>Engyprosopon grandisquama</i>  | sp84                           | sp18                                |
| 203 |                  |                    | <i>Psettina</i>                   | <i>Psettina iijimae</i>           | sp104                          | sp16                                |
| 204 |                  |                    |                                   | <i>Psettina tosana</i>            | sp105                          |                                     |
| 205 |                  |                    |                                   | <i>Chascanopsetta</i>             | <i>Chascanopsetta lugubris</i> |                                     |

|     |                        |                 |                         |                                  |       |       |
|-----|------------------------|-----------------|-------------------------|----------------------------------|-------|-------|
| 206 |                        |                 | <i>Asterorhombus</i>    | <i>Asterorhombus intermedius</i> |       |       |
| 207 |                        |                 | <i>Bothus</i>           | <i>Bothus myriaster</i>          |       |       |
| 208 |                        | Soleidae        | <i>Solea</i>            | <i>Solea ovata</i>               |       |       |
| 209 |                        |                 | <i>Aesopia</i>          | <i>Aesopia cornuta</i>           |       |       |
| 210 |                        |                 | <i>Pardachirus</i>      | <i>Pardachirus xenicus</i>       |       |       |
| 211 |                        |                 | <i>Zebrias</i>          | <i>Zebrias quagga</i>            |       | sp39  |
| 212 |                        | Paralichthyidae | <i>Pseudorhombus</i>    | <i>Pseudorhombus oligodon</i>    |       | sp113 |
| 213 |                        |                 |                         | <i>Pseudorhombus levisquamis</i> |       |       |
| 214 |                        |                 |                         | <i>Pseudorhombus cinnamoneus</i> |       |       |
| 215 |                        |                 |                         | <i>Pseudorhombus arsius</i>      |       |       |
| 216 | <b>MYCTOPHIFORMES</b>  | Synodidae       | <i>Saurida</i>          | <i>Saurida tumbil</i>            | sp11  | sp38  |
| 217 |                        |                 |                         | <i>Saurida undosquamis</i>       | sp16  | sp56  |
| 218 |                        |                 |                         | <i>Saurida elongata</i>          | sp135 |       |
| 219 |                        |                 | <i>Synodus</i>          | <i>Synodus macrops</i>           | sp60  | sp13  |
| 220 |                        |                 |                         | <i>Synodus indicus</i>           | sp67  | sp133 |
| 221 |                        |                 |                         | <i>Synodus hoshinonis</i>        | sp85  | sp70  |
| 222 |                        |                 |                         | <i>Synodus jaculum</i>           |       | sp55  |
| 223 |                        |                 | <i>Trachinocephalus</i> | <i>Trachinocephalus myops</i>    | sp68  | sp23  |
| 224 | <b>SCORPAENIFORMES</b> | Trigidae        | <i>Lepidotrigla</i>     | <i>Lepidotrigla alata</i>        | sp13  |       |
| 225 |                        |                 |                         | <i>Lepidotrigla japonica</i>     | sp89  | sp105 |
| 226 |                        |                 |                         | <i>Lepidotrigla abyssalis</i>    | sp111 |       |
| 227 |                        |                 | <i>Pterygotrigla</i>    | <i>Pterygotrigla hemisticta</i>  | sp113 |       |
| 228 |                        | Scorpaenidae    | <i>Apistus</i>          | <i>Apistus carinatus</i>         | sp30  | sp129 |
| 229 |                        |                 | <i>Brachypterois</i>    | <i>Brachypterois serrulata</i>   | sp45  | sp77  |
| 230 |                        |                 | <i>Sebastapistes</i>    | <i>Sebastapistes megalepis</i>   |       | sp19  |
| 231 |                        |                 | <i>Scorpaena</i>        | <i>Scorpaenodes parvipinnis</i>  | sp110 |       |

|     |                 |                      |                                 |       |       |
|-----|-----------------|----------------------|---------------------------------|-------|-------|
| 232 |                 |                      | <i>Scorpaena neglecta</i>       |       |       |
| 233 |                 | <i>Scorpaenopsis</i> | <i>Scorpaenopsis neglecta</i>   | sp46  | sp94  |
| 234 |                 | <i>Pterois</i>       | <i>Pterois russelli</i>         | sp58  |       |
| 235 |                 |                      | <i>Pterois lunulata</i>         | sp138 | sp57  |
| 236 |                 | <i>Brachypterois</i> | <i>Brachypterois serrulatus</i> |       |       |
| 237 |                 | <i>Parapterois</i>   | <i>Parapterois heterurus</i>    | sp79  | sp96  |
| 238 |                 | <i>Dendrochirus</i>  | <i>Dendrochirus zebra</i>       |       |       |
| 239 |                 |                      | <i>Dendrochirus bellus</i>      |       |       |
| 240 |                 | <i>Hoplosebastes</i> | <i>Hoplosebastes armatus</i>    |       |       |
| 241 | Platycephalidae | <i>Inegocia</i>      | <i>Inegocia japonicus</i>       |       | sp109 |
| 242 |                 | <i>Kumococius</i>    | <i>Kumococius detrusus</i>      | sp69  | sp2   |
| 243 |                 | <i>Onigocia</i>      | <i>Onigocia macrolepis</i>      | sp86  |       |
| 244 |                 |                      | <i>Onigocia spinosus</i>        | sp92  | sp75  |
| 245 |                 | <i>Cociella</i>      | <i>Cociella crocodilus</i>      |       |       |
| 246 |                 | <i>Rogadius</i>      | <i>Rogadius asper</i>           | sp106 | sp31  |
| 247 |                 | <i>Platycephalus</i> | <i>Platycephalus indicus</i>    |       |       |
| 248 |                 | <i>Elates</i>        | <i>Elates ransonnetii</i>       | sp165 |       |
| 249 |                 | <i>Grammoplites</i>  | <i>Grammoplites scaber</i>      | sp134 | sp65  |
| 250 |                 | <i>Sorsogona</i>     | <i>Sorsogona tuberculata</i>    |       |       |
| 251 | Hoplichthyidae  | <i>Hoplichthys</i>   | <i>Hoplichthys langsdorfi</i>   | sp150 |       |
| 252 | Dactylopteridae | <i>Daicocus</i>      | <i>Daicocus peterseni</i>       |       |       |
| 253 |                 | <i>Dactyloptena</i>  | <i>Dactyloptena orientalis</i>  | sp107 | sp32  |
| 254 | Synanceiidae    | <i>Minous</i>        | <i>Minous inermis</i>           |       |       |
| 255 |                 |                      | <i>Minous quincarinatus</i>     | sp80  |       |
| 256 |                 |                      | <i>Minous monodactylus</i>      |       |       |
| 257 |                 | <i>Inimicus</i>      | <i>Inimicus cuvieri</i>         |       |       |

|     |                       |                 |                       |                                    |       |       |
|-----|-----------------------|-----------------|-----------------------|------------------------------------|-------|-------|
| 258 |                       |                 | <i>Erosa</i>          | <i>Erosa erosa</i>                 | sp171 |       |
| 259 |                       | Bembridae       | <i>Bembras</i>        | <i>Bembras japonicus</i>           | sp140 |       |
| 260 |                       | Congiopodidae   | <i>Amblyapistus</i>   | <i>Amblyapistus macracanthus</i>   |       |       |
| 261 |                       |                 | <i>Erisphex</i>       | <i>Erisphex simplex</i>            |       |       |
| 262 |                       |                 | <i>Hypodytes</i>      | <i>Hypodytes longispinis</i>       |       |       |
| 263 | <b>GADIFORMES</b>     | Bregmacerotidae | <i>Bregmaceros</i>    | <i>Bregmaceros japonicus</i>       | sp95  |       |
| 264 |                       |                 |                       | <i>Bregmaceros maclellandi</i>     | sp123 | sp93  |
| 265 |                       | Macrouridae     | <i>Coelorhynchus</i>  | <i>Coelorhynchus longissimus</i>   | sp139 |       |
| 266 |                       | Moridae         | <i>Physiculus</i>     | <i>Physiculus nigrescens</i>       | sp166 |       |
| 267 | <b>ANGUILLIFORMES</b> | Muraenesocidae  | <i>Muraenesox</i>     | <i>Muraenesox cinereus</i>         | sp18  | sp45  |
| 268 |                       | Muraenidae      | <i>Gymnothorax</i>    | <i>Gymnothorax reticularis</i>     | sp87  |       |
| 269 |                       |                 |                       | <i>Gymnothorax chilospilus</i>     | sp101 | sp141 |
| 270 |                       |                 |                       | <i>Gymnothorax thyrsoides</i>      |       |       |
| 271 |                       |                 |                       | <i>Gymnothorax reevesi</i>         |       |       |
| 272 |                       |                 |                       | <i>Gymnothorax niphostigmus</i>    |       |       |
| 273 |                       |                 |                       | <i>Gymnothorax leucostigmus</i>    |       |       |
| 274 |                       |                 | <i>Strophidon</i>     | <i>Strophidon sathete</i>          |       |       |
| 275 |                       | Ophichthyidae   | <i>Brachysomophis</i> | <i>Brachysomophis crocodilinus</i> |       |       |
| 276 |                       |                 | <i>Pisoodonophis</i>  | <i>Pisoodonophis cancrivorus</i>   |       | sp114 |
| 277 |                       |                 |                       | <i>Pisoodonophis boro</i>          |       |       |
| 278 |                       |                 | <i>Ophichthus</i>     | <i>Ophichthus urolophus</i>        |       |       |
| 279 |                       |                 |                       | <i>Ophichthus evermanni</i>        |       |       |
| 280 |                       | Echelidae       | <i>Muraenichthys</i>  | <i>Muraenichthys malabonensis</i>  |       |       |
| 281 |                       | Dysommidae      | <i>Dysomma</i>        | <i>Dysomma anguillaris</i>         | sp19  | sp98  |
| 282 |                       | Congridae       | <i>Rhynchocymba</i>   | <i>Rhynchocymba nystromi</i>       | sp118 | sp131 |
| 283 |                       |                 |                       | <i>Rhynchocymba sivicola</i>       |       | sp119 |

|     |                         |                 |                        |                                       |       |       |
|-----|-------------------------|-----------------|------------------------|---------------------------------------|-------|-------|
| 284 |                         |                 | <i>Parabathymyrus</i>  | <i>Parabathymyrus macrophthalmus</i>  |       | sp24  |
| 285 |                         |                 |                        | <i>Rhynchoconger ectenurus</i>        |       |       |
| 286 |                         |                 | <i>Uroconger</i>       | <i>Uroconger lepturus</i>             | sp127 | sp67  |
| 287 |                         | Nettastomatidae | <i>Saurenehelys</i>    | <i>Saurenehelys fierasfer</i>         |       |       |
| 288 |                         | Neenchelyidae   | <i>Neenchelys</i>      | <i>Neenchelys parvipectoralis</i>     |       |       |
| 289 | <b>TETRAODONTIFORME</b> | Tetraodontidae  | <i>Gastrophysus</i>    | <i>Gastrophysus spadiceus</i>         | sp20  | sp153 |
| 290 |                         |                 |                        | <i>Gastrophysus lunaris</i>           |       |       |
| 291 |                         |                 | <i>Lagocephalus</i>    | <i>Lagocephalus inermis</i>           | sp43  | sp54  |
| 292 |                         |                 |                        | <i>Lagocephalus gloveri</i>           | sp61  |       |
| 293 |                         |                 |                        | <i>Lagocephalus suezensis</i>         |       |       |
| 294 |                         |                 | <i>Canthigaster</i>    | <i>Canthigaster rivulatus</i>         | sp75  | sp116 |
| 295 |                         |                 | <i>Pleuranacanthus</i> | <i>Pleuranacanthus scleratus</i>      |       |       |
| 296 |                         |                 | <i>Amblyrhynchotes</i> | <i>Amblyrhynchotes hypselogencion</i> |       |       |
| 297 |                         |                 | <i>Arothron</i>        | <i>Arothron nigropunctatus</i>        |       |       |
| 298 |                         |                 |                        | <i>Arothron immaculatus</i>           |       |       |
| 299 |                         | Aluteridae      | <i>Navodon</i>         | <i>Navodon xanthopterus</i>           | sp73  | sp62  |
| 300 |                         |                 | <i>Alutera</i>         | <i>Alutera monoceros</i>              | sp82  | sp30  |
| 301 |                         |                 | <i>Paramonacanthus</i> | <i>Paramonacanthus nipponensis</i>    | sp59  | sp103 |
| 302 |                         |                 | <i>Stephanolepis</i>   | <i>Stephanolepis cirrhifer</i>        |       |       |
| 303 |                         |                 | <i>Alutera</i>         | <i>Alutera scripta</i>                |       |       |
| 304 | <b>CLUPEIFORMES</b>     | Clupeidae       | <i>Sardinella</i>      | <i>Sardinella jussieu</i>             | sp34  | sp101 |
| 305 |                         |                 |                        | <i>Sardinella zunasi</i>              |       |       |
| 306 |                         |                 |                        | <i>Sardinella aurita</i>              |       | sp73  |
| 307 |                         |                 | <i>Clupanodon</i>      | <i>Clupanodon punctatus</i>           |       |       |
| 308 |                         |                 | <i>Dussumieria</i>     | <i>Dussumieria hasselti</i>           |       | sp140 |
| 309 |                         |                 | <i>Ilisha</i>          | <i>Ilisha melastoma</i>               | sp172 | sp51  |

|     |                          |                |                       |                                |       |       |
|-----|--------------------------|----------------|-----------------------|--------------------------------|-------|-------|
| 310 |                          | Engraulidae    | <i>Stolephorus</i>    | <i>Stolephorus chinensis</i>   | sp96  | sp149 |
| 311 |                          |                |                       | <i>Stolephorus indicus</i>     | sp131 |       |
| 312 |                          |                |                       | <i>Stolephorus commersoni</i>  |       | sp78  |
| 313 |                          |                | <i>Setipinna</i>      | <i>Setipinna taty</i>          | sp124 | sp61  |
| 314 |                          |                | <i>Coilia</i>         | <i>Coilia mystus</i>           |       | sp60  |
| 315 |                          |                | <i>Thrissa</i>        | <i>Thrissa hamiltonii</i>      |       | sp46  |
| 316 |                          |                |                       | <i>Thrissa mystax</i>          |       | sp147 |
| 317 |                          |                |                       | <i>Thrissa setirostris</i>     |       | sp143 |
| 318 |                          | Chirocentridae | <i>Chirocentrus</i>   | <i>Chirocentrus dorab</i>      |       |       |
| 319 | <b>MUGILIFORMES</b>      | Sphyraenidae   | <i>Sphyraena</i>      | <i>Sphyraena pinguis</i>       |       | sp135 |
| 320 |                          |                |                       | <i>Sphyraena forsteri</i>      |       | sp25  |
| 321 |                          |                |                       | <i>Sphyraena obtusata</i>      | sp170 |       |
| 322 |                          |                |                       | <i>Sphyraena jello</i>         |       |       |
| 323 |                          | Mugilidae      | <i>Osteomugil</i>     | <i>Osteomugil ophuyseni</i>    |       |       |
| 324 | <b>GASTEROSTEIFORMES</b> | Fistulariidae  | <i>Fistularia</i>     | <i>Fistularia petimba</i>      | sp54  | sp86  |
| 325 |                          |                |                       | <i>Fistularia villosa</i>      | sp71  |       |
| 326 |                          | Syngnathidae   | <i>Trachyrhamphus</i> | <i>Trachyrhamphus serratus</i> |       |       |
| 327 |                          | Solenostomidae | <i>Solenostomus</i>   | <i>Solenostomus paegnius</i>   |       |       |
| 328 | <b>LOPHIIFORME</b>       | Lophiidae      | <i>Lophiomus</i>      | <i>Lophiomus setigerus</i>     | sp78  | sp49  |
| 329 |                          | Ogcocephalidae | <i>Halieutaea</i>     | <i>Halieutaea stellata</i>     | sp81  | sp64  |
| 330 |                          |                |                       | <i>Halieutaea indica</i>       |       |       |
| 331 |                          |                |                       | <i>Halieutaea fumosa</i>       | sp141 |       |
| 332 |                          |                |                       | <i>Halieutaea sinica</i>       |       |       |
| 333 |                          |                | <i>Malthopsis</i>     | <i>Malthopsis luteus</i>       | sp169 |       |
| 334 |                          | Antennariidae  | <i>Antennarius</i>    | <i>Antennarius hispidus</i>    |       |       |
| 335 |                          |                |                       | <i>Antennarius striatus</i>    |       | sp28  |

|     |                          |                |                        |                                     |       |       |
|-----|--------------------------|----------------|------------------------|-------------------------------------|-------|-------|
| 336 |                          | Chaunacidae    | <i>Chaunax</i>         | <i>Chaunax fimbriatus</i>           | sp153 |       |
| 337 | <b>SILURIFORMES</b>      | Ariidae        | <i>Arius</i>           | <i>Arius sinensis</i>               | sp120 | sp148 |
| 338 |                          |                | <i>Netuma</i>          | <i>Netuma thalassina</i>            |       |       |
| 339 |                          | Plotosidae     | <i>Plotosus</i>        | <i>Plotosus lineatus</i>            |       |       |
| 340 | <b>OPHIDIIFORMES</b>     | Ophidiidae     | <i>Neobythites</i>     | <i>Neobythites unimaculatus</i>     | sp160 |       |
| 341 |                          |                | <i>Brotula</i>         | <i>Brotula multibarбата</i>         |       |       |
| 342 |                          |                | <i>Sirembo</i>         | <i>Sirembo imberbis</i>             | sp15  | sp126 |
| 343 | <b>GONORHYNCHIFORMES</b> | Gonorhynchidae | <i>Gonorhynchus</i>    | <i>Gonorhynchus abbreviatus</i>     |       |       |
| 344 | <b>BERYCIFORMES</b>      | Holocentridae  | <i>Ostichthys</i>      | <i>Ostichthys japonicus</i>         |       | sp104 |
| 345 | <b>ZEIFORMES</b>         | Zeidae         | <i>Zeus</i>            | <i>Zeus japonicus</i>               |       |       |
| 346 | <b>SALMONIFORMES</b>     | Argentinidae   | <i>Glossanodon</i>     | <i>Glossanodon semifasciatus</i>    | sp143 |       |
| 347 | <b>AULOPIIFORMES</b>     | Harpodontidae  | <i>Harpadon</i>        | <i>Harpadon nehereus</i>            | sp93  | sp89  |
| 348 | <b>MYXINIFORMES</b>      | Eptatretidae   | <i>Eptatretus</i>      | <i>Eptatretus burgeri</i>           |       |       |
| 349 | <b>TORPEDINIFORMES</b>   | Torpedinidae   | <i>Narcine</i>         | <i>Narcine maculata</i>             |       |       |
| 350 |                          |                |                        | <i>Narcine timlei</i>               |       |       |
| 351 | <b>MYLIOBATIFORMES</b>   | Dasyatidae     | <i>Dasyatis</i>        | <i>Dasyatis akajei</i>              | sp126 |       |
| 352 |                          |                |                        | <i>Dasyatis acutirostra</i>         |       |       |
| 353 |                          |                |                        | <i>Dasyatis zugei</i>               | sp115 | sp68  |
| 354 |                          |                |                        | <i>Dasyatis kuhli</i>               |       |       |
| 355 | <b>CARCHARHINIFORMES</b> | Carcharhinidae | <i>Scoliodon</i>       | <i>Scoliodon sorrakowah</i>         |       | sp66  |
| 356 |                          | Scyliorhinidae | <i>Gephaloscyllium</i> | <i>Gephaloscyllium sarawakensis</i> | sp142 |       |
| 357 |                          | Sphyrnidae     | <i>Sphyrna</i>         | <i>Sphyrna lewini</i>               |       |       |
| 358 | <b>ORECTOLOBIFORMES</b>  | Orectolobidae  | <i>Chiloscyllium</i>   | <i>Chiloscyllium plagiosum</i>      |       |       |
| 359 | <b>RAJIFORMES</b>        | Rajidae        | <i>Raja</i>            | <i>Raja hollandi</i>                |       | sp69  |
| 360 |                          |                |                        | <i>Raja boesemani</i>               | sp99  | sp11  |
| 361 |                          |                |                        | <i>Raja kanojei</i>                 |       |       |

|     |              |                   |                            |       |
|-----|--------------|-------------------|----------------------------|-------|
| 362 |              |                   | <i>Raja tengu</i>          |       |
| 363 | Platyrhinide | <i>Platyrhina</i> | <i>Platyrhina sinensis</i> | sp146 |



**Table S2****Dominant species (*IRI* > 100) in the nearshore waters of Hainan Island.**

| Species                             | Spring     | Autumn     |
|-------------------------------------|------------|------------|
|                                     | <i>IRI</i> | <i>IRI</i> |
| <i>Acropoma japonicum</i>           | 3013.82    | 332.49     |
| <i>Decapterus maruadsi</i>          | 1475.74    | 200.44     |
| <i>Navodon xanthopterus</i>         | 548.26     |            |
| <i>Trachurus japonicus</i>          | 386.92     |            |
| <i>Upeneus japonicus</i>            | 385.01     | 331.61     |
| <i>Psenopsis anomala</i>            | 321.09     |            |
| <i>Saurida tumbil</i>               | 217.72     | 646.08     |
| <i>Champsodon atridorsalis</i>      | 194.26     | 528.74     |
| <i>Saurida undosquamis</i>          | 147.97     | 380.45     |
| <i>Leiognathus bindus</i>           |            | 730.84     |
| <i>Leiognathus berbis</i>           |            | 451.21     |
| <i>Johnius belengeri</i>            |            | 392.12     |
| <i>Pennahia macrocephalus</i>       |            | 372.31     |
| <i>Brachypleura novaezeelandiae</i> |            | 256.09     |
| <i>Pennahia anea</i>                |            | 240.42     |
| <i>Therapon thraps</i>              |            | 178.53     |
| <i>Rogadius asper</i>               |            | 145.78     |
| <i>Upeneus sulphureus</i>           |            | 118.03     |
| <i>Ilisha melastoma</i>             |            | 113.01     |
| <i>Parargyrops edita</i>            |            | 108.69     |

**Table S3****Hainan Island nearshore marine diversity index. (I, II, III for Spring; I', II', III' for Autumn).**

| Zone | <i>D</i> |      |      | <i>H'</i> |      |      | <i>J'</i> |      |      |
|------|----------|------|------|-----------|------|------|-----------|------|------|
|      | MAX      | MIN  | AVG  | MAX       | MIN  | AVG  | MAX       | MIN  | AVG  |
| I    | 5.03     | 1.51 | 2.61 | 6.16      | 1.14 | 2.22 | 0.81      | 0.19 | 0.56 |
| I'   | 4.83     | 2.12 | 3.34 | 3.01      | 1.03 | 2.30 | 0.80      | 0.29 | 0.64 |
| II   | 4.88     | 1.51 | 3.21 | 2.82      | 0.54 | 2.23 | 0.88      | 0.18 | 0.65 |
| II'  | 4.66     | 2.08 | 3.51 | 3.11      | 1.88 | 2.72 | 0.85      | 0.58 | 0.76 |
| III  | 5.79     | 2.23 | 3.68 | 3.29      | 1.38 | 2.44 | 0.83      | 0.40 | 0.67 |
| III' | 4.92     | 2.57 | 3.56 | 2.98      | 1.68 | 2.49 | 0.81      | 0.47 | 0.70 |

**Table S4****Differences in the composition of community structure among coastal waters of Hainan Island in spring.**

| Zone          | <i>R</i> | <i>P</i> |
|---------------|----------|----------|
| Zone I & II   | 0.160    | < 0.05   |
| Zone I & III  | 0.522    | < 0.01   |
| Zone II & III | 0.313    | < 0.01   |

**Table S5****Differences in the composition of community structure among coastal waters of Hainan Island in autumn.**

| Zone          | <i>R</i> | <i>P</i> |
|---------------|----------|----------|
| Zone I & II   | 0.193    | < 0.01   |
| Zone I & III  | 0.731    | < 0.01   |
| Zone II & III | 0.429    | < 0.01   |

**Table S6****Typical species (contribution rate > 4%) and their contribution to the mean similarity within the group within each sea area in spring on Hainan Island.**

| Species                             | Zone I | Zone II | Zone III |
|-------------------------------------|--------|---------|----------|
| <i>Acropoma japonicum</i>           | 42.30  |         |          |
| <i>Decapterus maruadsi</i>          | 5.24   | 4.26    |          |
| <i>Brachypleura novaezeelandiae</i> | 5.08   |         |          |
| <i>Champsodon atridorsalis</i>      | 4.82   |         | 17.22    |
| <i>Saurida tumbil</i>               |        | 13.04   |          |
| <i>Psenopsis anomala</i>            |        | 8.35    |          |
| <i>Saurida undosquamis</i>          |        | 8.33    |          |
| <i>Apogon kiensis</i>               |        | 5.25    | 4.88     |
| <i>Paramonacanthus nipponensis</i>  |        | 5.13    |          |
| <i>Navodon xanthopterus</i>         |        | 4.03    | 15.57    |
| <i>Upeneus japonicus</i>            |        |         | 10.45    |

**Table S7****Divergent species (contribution rate > 4%) and their contribution to intergroup mean dissimilarity among different seas in spring on Hainan Island.**

| Species                     | Zone I & II | Zone I & III | Zone II & III |
|-----------------------------|-------------|--------------|---------------|
| <i>Acropoma japonicum</i>   | 8.48        | 8.24         |               |
| <i>Decapterus maruadsi</i>  | 4.30        |              |               |
| <i>Navodon xanthopterus</i> |             | 5.82         | 5.39          |
| <i>Upeneus japonicus</i>    |             | 4.12         | 4.07          |

**Table S8****Typical species (contribution rate > 4%) and their contribution to the mean similarity within the group within each sea area in autumn on Hainan Island.**

| Species                             | Zone I | Zone II | Zone III |
|-------------------------------------|--------|---------|----------|
| <i>Pennahia anea</i>                | 11.27  |         |          |
| <i>Johnius belengeri</i>            | 8.58   |         |          |
| <i>Pennahia macrocephalus</i>       | 8.57   |         |          |
| <i>Leiognathus bindus</i>           | 8.08   | 7.50    | 6.53     |
| <i>Therapon thraps</i>              | 7.73   |         |          |
| <i>Leiognathus berbis</i>           |        | 8.49    |          |
| <i>Saurida tumbil</i>               |        | 6.59    | 13.64    |
| <i>Champsodon atridorsalis</i>      |        | 5.69    | 18.63    |
| <i>Upeneus sulphureus</i>           |        | 4.52    |          |
| <i>Decapterus maruadsi</i>          |        | 4.07    |          |
| <i>Saurida undosquamis</i>          |        |         | 11.78    |
| <i>Brachypleura novaezeelandiae</i> |        |         | 8.29     |

**Table S9****Divergent species (contribution rate > 4%) and their contribution to intergroup mean dissimilarity among different seas in autumn on Hainan Island.**

| Species                        | Zone I & II | Zone I & III | Zone II & III |
|--------------------------------|-------------|--------------|---------------|
| <i>Leiognathus bindus</i>      | 4.35        |              |               |
| <i>Johnius belengeri</i>       | 4.03        |              |               |
| <i>Champsodon atridorsalis</i> |             | 5.48         | 4.89          |
| <i>Leiognathus berbis</i>      |             |              | 4.14          |



**Figure S1**

Spatial and temporal variability of biotic (abundance, biomass) and abiotic (temperature, salinity) factors in the nearshore waters of Hainan Island. Marine Distribution: I, Zone I; II, Zone II; III, Zone III. (a), (c), (e), (g) for spring; (b), (d), (f), (h) for autumn.

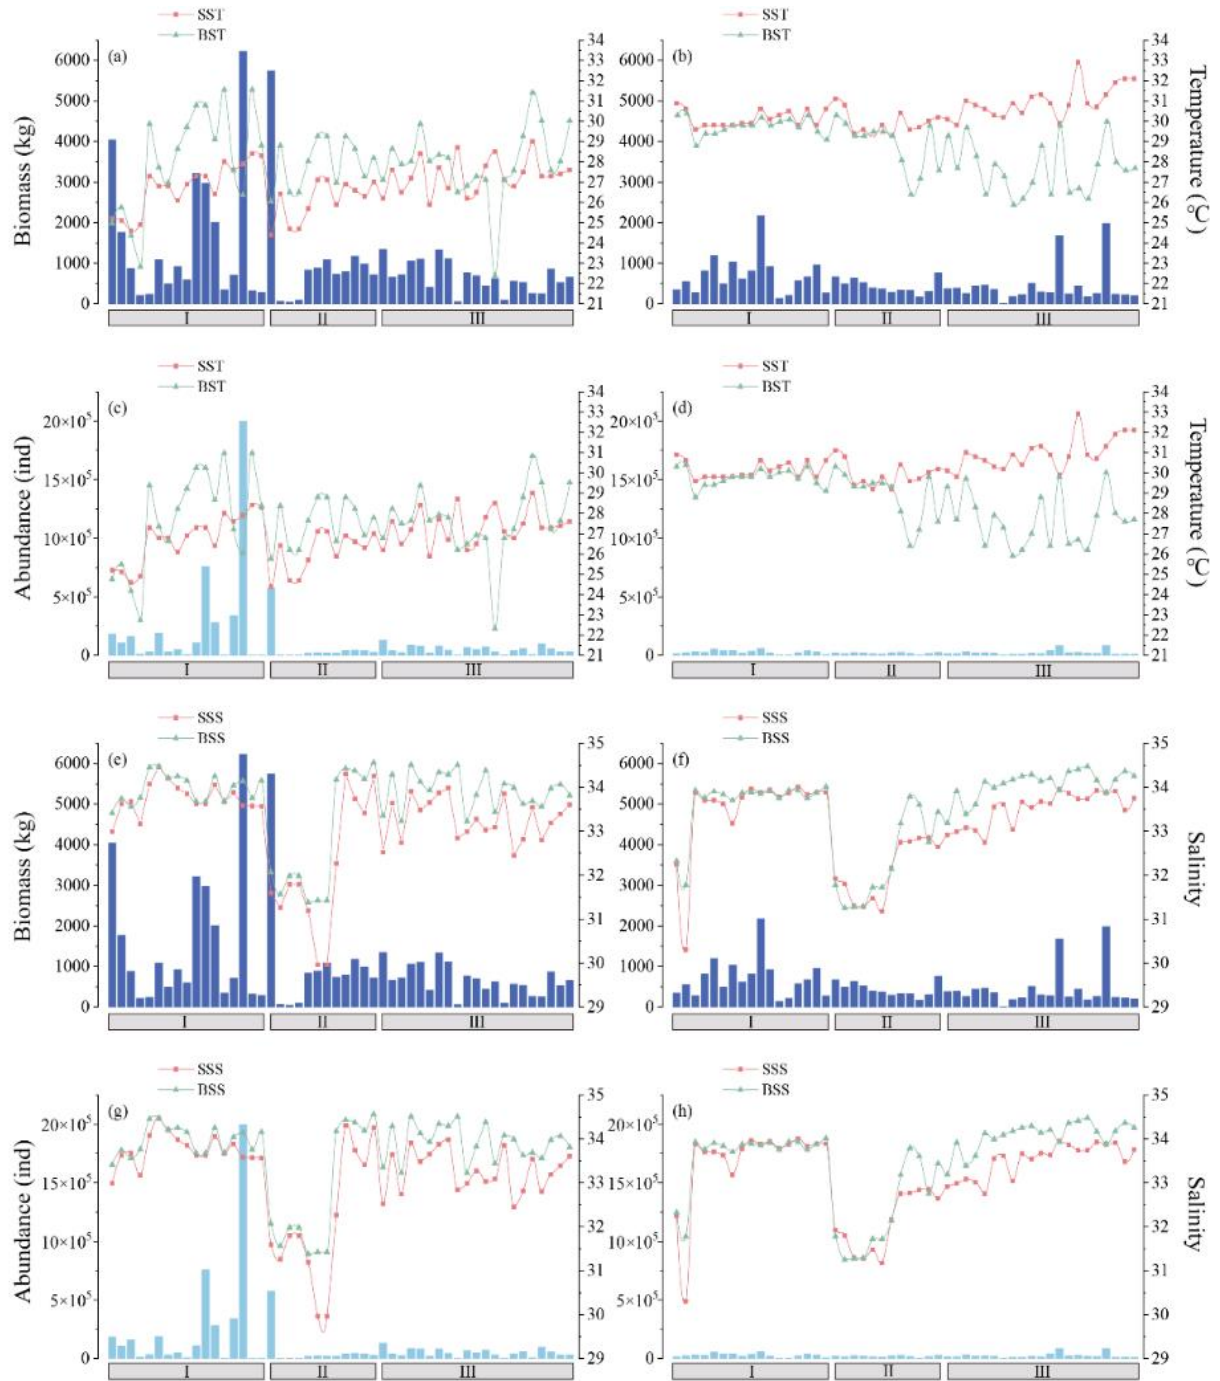

Supplement: s1 [file s1]
